# Supplementary material for: Proinflammatory microenvironment promotes lymphoma progression in mice with high megakaryocyte and TPO levels
Source: PubMed Central journal article supplement — Blood Adv. 2022 Sep 9;7(8):1560–71. doi: 10.1182/bloodadvances.2022007849 (PMC10139866; doi:10.1182/bloodadvances.2022007849), 2022-09-09
Supplement: BLOODA_ADV-2022-007849-mmc1.pdf [file BLOODA_ADV-2022-007849-mmc1.pdf]

## SUPPLEMENTAL DATA AND METHODS

### SUPPLEMENTAL METHODS

#### Materials

DMSO (D2650), and thrombin (T9326-150UN) were from Sigma-Aldrich (St. Louis, MO USA). Calibration beads 3.5–4.0  $\mu\text{m}$  were from Spherotech Inc (Lake Forest, IL USA). Anti-platelet serum was purchased from Cedarlane (Burlington, Ontario Canada). P-selectin ELISA kit and Proteome profiler array, mouse cytokine array panel A (ARY006) were purchased from R&D Systems (Minneapolis, MA USA). Clopidogrel was purchased from Clifford Hallam Healthcare (Keysborough, Australia). Soluble aspirin tablets (AsproClear) were derived from Bayer (Pymble NSW, Australia) and Clexane (enoxaparin sodium) was from Sanofi (Macquarie Park NSW, Australia).

#### Generation and maintenance of cell lines

Immortalised E $\mu$ -*myc* mouse lymphoma cells 5849, A118C, AF40A and 1194 were all Immature B (B220<sup>+</sup>, cKit<sup>-</sup>, IgD<sup>low</sup>, IgM<sup>+</sup>) derived from spleens and lymph nodes of sick E $\mu$ -*myc* mice and were generated and cultured as previously described<sup>1</sup>. A118C and AF40A were kindly provided by Dr. Stanley Lee. They were maintained in high-glucose Dulbecco's modified Eagle's media (DMEM, Gibco) supplemented with 1mM HEPES, 13.5 $\mu\text{M}$  folic acid, 0.34mM L-Asparagine, 0.55mM L-Arginine, 22.2mM D-Glucose, 100U/mL penicillin-streptomycin, 10% (v/v) heat-inactivated foetal calf serum and 50 $\mu\text{M}$   $\beta$ -mercaptoethanol. Cultures were maintained in a 10% CO<sub>2</sub> humidified 37°C incubator. GRANTA cells (kindly provided by the Huang laboratory, WEHI) and were grown in RPMI 1640 + 10% (v/v) heat-inactivated foetal calf serum in a 5% CO<sub>2</sub> humidified 37°C incubator

#### Lymphoma cell survival

To assess the effect of platelets on lymphoma cells; 1x10<sup>7</sup> washed murine platelets/well or 1-fold PRMs were co-incubated with 5x10<sup>4</sup> E $\mu$ -*myc* cells in a flat-bottom 96-well plate at 37°C and 5% serum or under reducing serum concentrations (0-10% FBS) in media described above. At 24 or 48 hours post-stimulation, viability and cell number was assessed by Flow cytometry. Cell viability was determined by the exclusion of the nuclear dye, Fluoro-Gold; (Fluorochrome) and cell number using known amounts of APC-coated beads (Miltenyi

Biotech). Surface markers to detect Eμ-*myc* cells (CD19) and platelets (CD41) were included. Serum starvation for 24 h was performed prior platelet incubation when indicated.

### **Flow cytometry**

Fluorescently conjugated anti-mouse antibodies used for flow-cytometric analyses were either purchased or produced by the WEHI monoclonal antibody production facility. WEHI antibodies: B220 (RA3-6B2), CD19 (1D3), cKit (CD117 clone:ACK-4) and IgM (5.1). BD Biosciences (Franklin Lakes NY, USA) antibodies: IgD (11-26c.2a), P-selectin (RB40.34) and CD41 (MWRReg30). Data was acquired using the Fortessa flow cytometer or FACS Calibur flow cytometer and sorting performed on the FACSAria II flow cytometer (BD Biosciences). Analysis was performed using Flowjo software (TreeSTAR).

### **Purification of murine platelets**

Murine washed platelets were purified as previously described <sup>2</sup>. Blood from C57BL/6 mice was obtained by cardiac puncture into 0.1 volume of Aster-Jandl anticoagulant (85 mM sodium citrate, 69 mM citric acid, and 20 mg/ml glucose, pH 4.6) <sup>3</sup>. Platelet-rich plasma (PRP) was obtained by centrifugation at 125 g for 8 min, followed by centrifugation of the supernatant buffy coat at 125 g for 8 min. Platelets were washed by two sequential centrifugations at 860 g for 5 min in 140 mM NaCl, 5 mM KCl, 12 mM trisodium citrate, 10 mM glucose, and 12.5 mM sucrose, pH 6.0 (buffer A). The platelet pellet was resuspended in 10 mM Hepes, 140 mM NaCl, 3 mM KCl, 0.5 mM MgCl<sub>2</sub>, 10 mM glucose, and 0.5 mM NaHCO<sub>3</sub>, pH 7.4 (buffer B) at a concentration of 1–5 x 10<sup>8</sup> cells/ml. The platelet count was determined by flow cytometric analysis by adding a known concentration of FACS calibration beads (Spherotech) on the FACS Calibur flow cytometer.

### **Purification of platelet released molecules**

Platelets were prepared and counted as described above and resuspended to 3x10<sup>8</sup> cells/ml in buffer B. PRMs were prepared as previously described <sup>4</sup>, where washed platelets were activated with 1U/ml thrombin for 15 minutes at room temperature on a tube roller (an aliquot of platelets was taken at this time point for FACS confirmation of platelet activation by P-selectin surface expression). The vehicle control for PRM was buffer B with 1 U/ml thrombin. Activated platelets were centrifuged at 1500xg for 5 minutes and the supernatant (and vehicle control) was transferred to a 3-kDa molecular weight cut-off ultra-centrifugal filter device Amicon® (Merck Millipore). Supernatant was centrifuged at 3250xg until the volume was reduced to

500uL (approximately 50 minutes), achieving a 20-fold volumetric concentration. Aliquots of platelet released molecules were stored at -80°C until required.

### **Production of passage 1 Eμ-*myc* cells**

Primary immature B (B220<sup>+</sup>, cKit<sup>-</sup>, IgD<sup>low</sup>, IgM<sup>+</sup>) Eμ-*myc* lymphoma cells (166, 5849 and 5903) were harvested from lymph nodes (axillary, brachial, inguinal and mesenteric) and spleen of terminally ill Eμ-*myc* mice. The harvested cells were then transplanted IV via the tail vein into recipient C57BL/6 wild-type mice to generate passage 1 (P1) Eμ-*myc* lymphoma cells (harvested from spleen and lymph nodes) subsequently used in transplant experiments.

### **Production of passage 1 Eμ-*Tcl-1* cells**

In a similar manner to our investigations with the Eμ-*myc* mice we collected and characterised spleen tumours cells from Eμ-*Tcl-1* transgenic mice <sup>5</sup> by flow cytometry. The harvested cells were then transplanted IV via the tail vein into recipient C57BL/6 wild-type mice to generate passage 1 (P1) Eμ-*Tcl-1* cells (harvested from spleen) subsequently used in transplant experiments.

### ***In vivo* transplantation of Eμ-*Tcl-1* cells**

Wild-type C57BL/6, *Mpl<sup>-/-</sup>*, *Tpo<sup>Tg</sup>* were injected IV with 10<sup>4</sup> (P1) Eμ-*Tcl-1* CLL cells and analysed 100 days post tumour transplantation. Disease severity was measured by peripheral blood counts, spleen and lymph node (axillary, brachial, inguinal and mesenteric) weights.

### **Peripheral blood counts**

Automated cell counts were performed on blood collected from the retro-orbital plexus or by cardiac puncture into Microtainer tubes containing EDTA (Sarstedt, Ingle Farm, SA Australia), using an ADVIA 2120 haematological analyser (Siemens, Munich Germany) equipped with a mouse analysis software module (Bayer).

### **B-cell subset analysis**

Spleen cell suspensions were prepared by physical dissociation in 3 ml of BSS 2% FCS. Subsequently, 7 ml of Red Cell Removal Buffer (156 mM NH<sub>4</sub>Cl, 0.1 mM EDTA, and 12 mM NaHCO<sub>3</sub>) was added for 1 min at room temperature. After centrifugation the supernatants were aspirated and the pellet was resuspended in 5 ml of BSS 2% FCS. Cell suspensions were filtered

using a 100 µm cell strainer. B-cell populations were defined as ProB-PreB1 (B220<sup>+</sup> cKit<sup>+</sup>), PreB2 (B220<sup>+</sup> cKit<sup>-</sup> IgD<sup>-</sup> IgM<sup>-</sup>), Immature (B220<sup>+</sup> cKit<sup>-</sup> IgD<sup>-</sup> IgM<sup>+</sup>), Mature (B220<sup>+</sup> cKit<sup>-</sup> IgD<sup>+</sup> IgM<sup>+</sup>). Data was acquired using a LSRFortessa flow cytometer (BD, Franklin Lakes, NY, USA), and data analysis was performed using FlowJo software 10.3.0 (Treestar Inc, Ashland, USA).

### **Tumour liver infiltration**

Whole livers were removed and fixed in 4% paraformaldehyde overnight. Livers were then dehydrated overnight and paraffin embedded using an automatic tissue processor. Sections were cut, mounted on slides and stained with haematoxylin and eosin (H&E). Entire slides were scanned using the Aperio ScanScope AT Slide scanner (Leica Biosciences) and processed on ImageScope. Whole liver sections were analysed in a blinded fashion using a custom macro in FIJI using the colour deconvolution plug-in <sup>6</sup> to quantify the total area of lymphocyte infiltration as percent whereby infiltrated tumour cells stain darker than surrounding healthy tissue.

### **Anti-platelet serum mediated thrombocytopenia**

Acute thrombocytopenia was induced by IV injection of 100 µl of anti-platelet serum (APS) (Cedarlane) per 20 g body weight at a 1:25 pre-dilution. This reduces platelet counts to near undetectable levels within 24 h, followed by rebound thrombocytosis <sup>2</sup>. Male wild-type C57BL/6 mice were transplanted IV on day 1 with Eµ-*myc* 5849 tumour cells (2 x10<sup>4</sup>) and acute thrombocytopenia was induced by APS IV injection on day 0 or alternatively on day 0, day 3 and day 6. Mice were analysed on day 16. Disease severity was measured by peripheral blood counts and spleen weight.

### ***In vivo* imaging (IVIS imaging)**

P1 5849 lymphoma cells were transduced with pMSCV-Luc2-IRES-mCherry retroviral vector <sup>7</sup> in the presence of retronectin. Successfully transduced cells were washed in PBS and 10<sup>4</sup> cells injected IV into wild-type C57BL/6 albino and *Tpo<sup>Tg</sup>* C57BL/6 albino recipient mice. To visualize tumour burden, recipient mice were injected IP with 50mg/kg D-luciferin potassium salt (Caliper Life Sciences) made in PBS. Mice were anaesthetized with isoflurane inhalant and imaged using the Xenogen IVIS spectrum live-imaging system (Perkin Elmer) to detect luciferase bioluminescence 10 minutes after administration of the D-luciferin substrate.

Tumour burden was quantified 7 days post tumour injection by measuring the total photon flux per second emitted from a region of interest (ROI) drawn around the whole mouse.

### **Quantification of soluble P-selectin in serum**

For sP-selectin ELISA, blood ( $\geq 200\mu\text{L}$ ) was collected from healthy and tumour bearing mice either by retro-orbital bleed into a non-heparinised capillary, or cardiac puncture and left to clot for 2 hours at room temperature. The clotted blood was centrifuged at 2000 *g* for 20 minutes and serum was stored at  $-80^{\circ}\text{C}$  until required. Serum was diluted 1:50 in buffer supplied by the manufacturer and the ELISA was performed according to manufacturer's instructions.

### **Cytokine analysis of BM fluid**

Proteome profiler array, mouse cytokine array panel A (R&D #ARY006) includes CXCL13/BCA-1, C5/C5a, G-CSF, GM-CSF, I-309, Eotaxin, sICAM-1, INF- $\gamma$ , IL-1a, IL-1 $\beta$ , IL-1 $\alpha$ , IL-2, IL-3, IL-4, IL-5, IL-6, IL-7, IL-10, IL-13, IL-12 p70, IL-16, IL-17, IL-23, IL-27, IP-10, I-TAC, KC, M-CSF, JE, MCP-5, MIG, MIP-1 $\alpha$ , MIP-1 $\beta$ , MIP-2, RANTES, SDF-1, TARC, TIMP-1, TNF- $\alpha$ , and TREM-1.

### **RNA sequencing and gene expression analysis of blood residing E $\mu$ -myc cells**

mCherry<sup>+</sup>E $\mu$ -myc 5849  $2 \times 10^4$  cells were transplanted IP into age and gender matched *Tpo<sup>Tg</sup>* and wild-type mice (WT). CD19 mCherry double positive and fluorogold negative cells were sorted on a FACS Aria II flow cytometer (BD Biosciences) from blood of tumour bearing mice day 15 (1 WT, 1 *Tpo<sup>Tg</sup>*) and day 19 (3 WT, 2 *Tpo<sup>Tg</sup>*) after tumor transplant. Blood was drawn into EDTA and RBCs were depleted before sorting. After sorting, cell pellets were frozen down and all RNA samples were prepared at the same time using RNeasy mini kit according to the RNeasy mini handbook from Qiagen (Germantown, MD, USA). mRNA libraries were prepared and samples were sequenced at the Australian Genome Research Facility (AGRF) on the Illumina HiSeq platform to obtain 100bp single end reads per sample.

Reads were aligned to the mm10 build of the mouse genome using the STAR software package v2.5.3a<sup>8</sup>. Over 96% of reads mapped to the reference genome for each sample. Following alignment, successfully mapped reads were summarized into gene-level counts using the featureCounts function<sup>9</sup> from the Rsubread software package v1.27.4<sup>10</sup> where an average of 71% of reads were assigned to genes for all samples. Genes were identified using NCBI RefSeq

annotation. Differential expression analyses were carried out using limma v3. 3.50.0 <sup>11</sup> and edgeR v3.36.0 <sup>12</sup>.

Expression-based filtering for lowly expressed genes was performed using edgeR's filterByExpr function with default parameters. A total of 10,802 genes remained for downstream analysis. Compositional differences between the libraries were normalized using the trimmed mean of M-values (TMM) method <sup>13</sup>. Read counts were transformed to log-counts-per-million before applying the RUVIII method from the ruv software package v0.9.7.1 <sup>14</sup> with  $k=2$  to remove unwanted variation. Differential expression between *Tpo<sup>Tg</sup>* and WT samples was assessed using linear models and robust empirical Bayes moderated t-statistics with a trended prior variance (the limma-trend pipeline) <sup>15</sup>. The false discovery rate (FDR) was controlled below 5% using the Benjamini and Hochberg method <sup>16</sup>. The mean-difference plot was generated using the plotMD function in limma. Pathway analyses were performed on differentially expressed genes to test for overrepresentation of biological pathways as defined by Molecular Signatures Database (MSigDB) hallmark gene sets <sup>17,18</sup> using the fry gene set test. The GEO accession number is GSE199782.

### **Pharmacological inhibition of platelet function and coagulation**

Wild-type C57BL/6 male mice were transplanted IV with immortalised Eμ-*myc* 5849 cells ( $2 \times 10^4$ ). Mice were euthanised and analysed at the same time once the first mouse in the experimental cohort reached an ethical end point. Disease severity was measured by peripheral blood counts and spleen weight.

Aspirin treatment. Aspirin was administered at a dose of approximately 25 mg/kg/day for the duration of the experiment. Mice were pre-treated with aspirin for 1 week prior to Eμ-*myc* IV injection. Soluble aspirin tablets (AsproClear) were dissolved in water to a concentration of 25 mg/ml. Aspirin solution was injected into animal hydropacs (~400mL volume) at a 1:80 dilution. Assuming each animal drinks on average between 3 and 4 mL of water each day <sup>19</sup> 25mg/mL dilution equates to 4.7 to 5mg aspirin each day for a 25g mouse (20mg/kg dosage). At a dose of approximately 25 mg/kg/day for the duration of the experiment.

Clopidogrel treatment. Mice were dosed daily via oral gavage with 200μl Clopidogrel at 50mg/kg in 0.5% methylcellulose. Drug treatment was initiated 1 day prior to tumour cell transplant and continued throughout the experiment. Vehicle-treated mice received 200μl 0.5% methylcellulose by oral gavage at the same timing and frequency as the Clopidogrel-treated mice.

Low molecular weight heparin treatment. Clexane (enoxaparin sodium) and vehicle (saline) was administered *s.c.* at 5 and 10 mg/kg starting 1 day prior tumour transplant.

**SUPPLEMENTAL REFERENCES**

1. Kelly GL, Grabow S, Glaser SP, et al. Targeting of MCL-1 kills MYC-driven mouse and human lymphomas even when they bear mutations in p53. *Genes Dev.* 2014;28(1):58-70.
2. Pleines I, Lebois M, Gangatirkar P, et al. Intrinsic apoptosis circumvents the functional decline of circulating platelets but does not cause the storage lesion. *Blood.* 2018;132(2):197-209.
3. Josefsson EC, White MJ, Dowling MR, Kile BT. Platelet life span and apoptosis. *Methods Mol Biol.* 2012;788:59-71.
4. Hyslop SR, Alexander M, Thai AA, et al. Targeting platelets for improved outcome in KRAS-driven lung adenocarcinoma. *Oncogene.* 2020;39(29):5177-5186.
5. Bichi R, Shinton SA, Martin ES, et al. Human chronic lymphocytic leukemia modeled in mouse by targeted TCL1 expression. *Proc Natl Acad Sci U S A.* 2002;99(10):6955-6960.
6. Schindelin J, Arganda-Carreras I, Frise E, et al. Fiji: an open-source platform for biological-image analysis. *Nat Methods.* 2012;9(7):676-682.
7. Xu Z, Sharp PP, Yao Y, et al. BET inhibition represses miR17-92 to drive BIM-initiated apoptosis of normal and transformed hematopoietic cells. *Leukemia.* 2016;30(7):1531-1541.
8. Dobin A, Davis CA, Schlesinger F, et al. STAR: ultrafast universal RNA-seq aligner. *Bioinformatics.* 2013;29(1):15-21.
9. Liao Y, Smyth GK, Shi W. featureCounts: an efficient general purpose program for assigning sequence reads to genomic features. *Bioinformatics.* 2014;30(7):923-930.
10. Liao Y, Smyth GK, Shi W. The R package Rsubread is easier, faster, cheaper and better for alignment and quantification of RNA sequencing reads. *Nucleic Acids Res.* 2019;47(8):e47.
11. Ritchie ME, Phipson B, Wu D, et al. limma powers differential expression analyses for RNA-sequencing and microarray studies. *Nucleic Acids Res.* 2015;43(7):e47.
12. Robinson MD, McCarthy DJ, Smyth GK. edgeR: a Bioconductor package for differential expression analysis of digital gene expression data. *Bioinformatics.* 2010;26(1):139-140.
13. Robinson MD, Oshlack A. A scaling normalization method for differential expression analysis of RNA-seq data. *Genome Biol.* 2010;11(3):R25.
14. Gagnon-Bartsch JA, Speed TP. Using control genes to correct for unwanted variation in microarray data. *Biostatistics.* 2012;13(3):539-552.
15. Phipson B, Lee S, Majewski IJ, Alexander WS, Smyth GK. ROBUST HYPERPARAMETER ESTIMATION PROTECTS AGAINST HYPERVARIABLE GENES AND IMPROVES POWER TO DETECT DIFFERENTIAL EXPRESSION. *Ann Appl Stat.* 2016;10(2):946-963.
16. Benjamini Y, Hochberg Y. Controlling the false discovery rate: a practical and powerful approach to multiple testing. *Journal of the Royal statistical society: series B (Methodological).* 1995;57(1):289-300.
17. Liberzon A, Birger C, Thorvaldsdóttir H, Ghandi M, Mesirov JP, Tamayo P. The Molecular Signatures Database (MSigDB) hallmark gene set collection. *Cell Syst.* 2015;1(6):417-425.
18. Subramanian A, Tamayo P, Mootha VK, et al. Gene set enrichment analysis: a knowledge-based approach for interpreting genome-wide expression profiles. *Proc Natl Acad Sci U S A.* 2005;102(43):15545-15550.
19. Cyrus T, Sung S, Zhao L, Funk CD, Tang S, Praticò D. Effect of low-dose aspirin on vascular inflammation, plaque stability, and atherogenesis in low-density lipoprotein receptor-deficient mice. *Circulation.* 2002;106(10):1282-1287.



## SUPPLEMENTAL TABLES

**Supplemental Table 1. Upregulated inflammatory genes.**

39 upregulated protein-coding inflammatory genes in blood-residing Eμ-*myc* lymphoma cells in *Tpo<sup>Tg</sup>* mice compared to blood-residing Eμ-*myc* lymphoma cells in wild-type mice. Genes are sorted after P-values starting with highest significance.

| Symbol   | GeneID | logFC      | AveExpr    | t          | P.Value    | adj.P.Val  | B          |
|----------|--------|------------|------------|------------|------------|------------|------------|
| Plec     | 18810  | 0.20832027 | 9.28647219 | 9.66209364 | 4.32E-06   | 0.00686737 | 4.72037042 |
| Plaur    | 18793  | 0.50058286 | 4.66867192 | 8.272431   | 1.56E-05   | 0.00701648 | 3.55984432 |
| Rabgap1l | 29809  | 0.25589858 | 7.51760154 | 7.45059094 | 3.62E-05   | 0.00948352 | 2.77195991 |
| Ahnak    | 66395  | 0.16316701 | 11.8655589 | 7.34221112 | 4.06E-05   | 0.00975671 | 2.66178158 |
| B4galt5  | 56336  | 0.15603342 | 6.81586378 | 6.65536905 | 8.75E-05   | 0.01281922 | 1.92699093 |
| Ager     | 11596  | 0.62510012 | 2.21075326 | 6.63978018 | 8.91E-05   | 0.01281922 | 1.90955556 |
| Myo1g    | 2E+05  | 0.18996745 | 7.85676044 | 6.42793093 | 0.00011424 | 0.01310044 | 1.66915291 |
| Mxd1     | 17119  | 0.31454711 | 4.79682482 | 6.41810829 | 0.00011558 | 0.01310044 | 1.65784862 |
| P2rx4    | 18438  | 0.34869478 | 3.82744145 | 6.26649274 | 0.00013855 | 0.013606   | 1.48156609 |
| Cd86     | 12524  | 0.29503012 | 4.48107059 | 6.23670439 | 0.00014362 | 0.01360617 | 1.44653194 |
| Klf4     | 16600  | 0.29705386 | 4.78542639 | 6.08042248 | 0.00017376 | 0.01454476 | 1.26055489 |
| Tnfrsf1b | 21938  | 0.2995342  | 3.86717847 | 5.76151639 | 0.00025888 | 0.01635346 | 0.86955275 |
| Ecm1     | 13601  | 0.43089392 | 3.07696944 | 5.73477065 | 0.00026785 | 0.01646938 | 0.83604927 |
| Macf1    | 11426  | 0.13778582 | 9.44028669 | 5.68625559 | 0.00028499 | 0.01646938 | 0.77499254 |
| P2rx7    | 18439  | 0.55712145 | 2.72900936 | 5.62880506 | 0.00030683 | 0.01656086 | 0.7022163  |
| Abca1    | 11303  | 0.52566875 | 3.36973696 | 5.48337242 | 0.00037067 | 0.01819158 | 0.51567881 |
| Il10ra   | 16154  | 0.28144598 | 5.70584442 | 5.23186683 | 0.00051758 | 0.02039172 | 0.18522502 |
| Irf7     | 54123  | 0.29902421 | 6.30995843 | 5.0714181  | 0.00064344 | 0.02173515 | -0.0308192 |
| Klf6     | 23849  | 0.18707191 | 7.23887692 | 4.90906286 | 0.00080501 | 0.02408794 | -0.2535774 |
| Muc1     | 17829  | 0.54460728 | 2.21063191 | 4.77443369 | 0.00097216 | 0.02667527 | -0.4414433 |
| Pdlim7   | 67399  | 0.3402256  | 3.46196137 | 4.6459513  | 0.0011668  | 0.02876052 | -0.6233712 |
| Ddx58    | 2E+05  | 0.29696547 | 4.38335397 | 4.59987416 | 0.00124645 | 0.02937868 | -0.6892375 |
| Btg2     | 12227  | 0.22455234 | 6.04727962 | 4.42517138 | 0.00160554 | 0.03222182 | -0.9419128 |
| B4galt1  | 14595  | 0.14339188 | 6.4516156  | 4.41235269 | 0.00163593 | 0.03238503 | -0.9606338 |
| Capn1    | 12333  | 0.16348229 | 5.65085173 | 4.26396367 | 0.00203597 | 0.03647193 | -1.1791122 |
| Lrrc8b   | 4E+05  | 0.25834087 | 3.76973188 | 4.25094534 | 0.00207574 | 0.03667661 | -1.1984325 |
| Emp3     | 13732  | 0.09474549 | 8.032672   | 4.24631418 | 0.00209008 | 0.03667661 | -1.2053114 |
| Naip5    | 17951  | 0.23610593 | 3.67975818 | 4.19312993 | 0.00226258 | 0.0376523  | -1.2845282 |
| Adgre1   | 13733  | 0.7444456  | 0.1917997  | 4.16990923 | 0.00234259 | 0.03844243 | -1.3192406 |
| Slc11a1  | 18173  | 0.64285154 | 0.83689155 | 4.14298068 | 0.00243915 | 0.03904169 | -1.3595903 |
| Tlr7     | 2E+05  | 0.56148307 | 1.07197141 | 4.12370479 | 0.00251087 | 0.03975032 | -1.3885353 |
| Flt3l    | 14256  | 0.20056438 | 3.87439594 | 4.08548712 | 0.00265975 | 0.04073208 | -1.4460748 |
| Gnai2    | 14678  | 0.07663752 | 8.86703885 | 4.05913481 | 0.00276786 | 0.04132965 | -1.4858662 |
| Capg     | 12332  | 0.1797919  | 7.41123107 | 3.98728753 | 0.00308693 | 0.04358826 | -1.5948268 |
| Gpr183   | 3E+05  | 0.28829992 | 4.40997407 | 3.93613607 | 0.0033377  | 0.04535078 | -1.6728139 |
| Cdc42se2 | 72729  | 0.09789407 | 7.1480812  | 3.92023654 | 0.00341997 | 0.04567321 | -1.6971234 |
| Casp7    | 12369  | 0.15390735 | 4.53483097 | 3.90180267 | 0.00351805 | 0.04634385 | -1.7253478 |
| Nrp1     | 18186  | 0.7176459  | 0.09086008 | 3.86001791 | 0.00375153 | 0.04784416 | -1.7894827 |
| Itga2b   | 16399  | 1.30427651 | 1.77051074 | 3.82382162 | 0.00396701 | 0.0490855  | -1.8452134 |

| Description                                                                         |
|-------------------------------------------------------------------------------------|
| plectin                                                                             |
| plasminogen activator, urokinase receptor                                           |
| RAB GTPase activating protein 1-like                                                |
| AHNAK nucleoprotein (desmoyokin)                                                    |
| UDP-Gal:betaGlcNAc beta 1,4-galactosyltransferase, polypeptide 5                    |
| advanced glycosylation end product-specific receptor                                |
| myosin IG                                                                           |
| MAX dimerization protein 1                                                          |
| purinergic receptor P2X, ligand-gated ion channel 4                                 |
| CD86 antigen                                                                        |
| Kruppel-like factor 4 (gut)                                                         |
| tumor necrosis factor receptor superfamily, member 1b                               |
| extracellular matrix protein 1                                                      |
| microtubule-actin crosslinking factor 1                                             |
| purinergic receptor P2X, ligand-gated ion channel, 7                                |
| ATP-binding cassette, sub-family A (ABC1), member 1                                 |
| interleukin 10 receptor, alpha                                                      |
| interferon regulatory factor 7                                                      |
| Kruppel-like factor 6                                                               |
| mucin 1, transmembrane                                                              |
| PDZ and LIM domain 7                                                                |
| DEAD (Asp-Glu-Ala-Asp) box polypeptide 58                                           |
| B cell translocation gene 2, anti-proliferative                                     |
| UDP-Gal:betaGlcNAc beta 1,4- galactosyltransferase, polypeptide 1                   |
| calpain 1                                                                           |
| leucine rich repeat containing 8 family, member B                                   |
| epithelial membrane protein 3                                                       |
| NLR family, apoptosis inhibitory protein 5                                          |
| adhesion G protein-coupled receptor E1                                              |
| solute carrier family 11 (proton-coupled divalent metal ion transporters), member 1 |
| toll-like receptor 7                                                                |
| FMS-like tyrosine kinase 3 ligand                                                   |
| guanine nucleotide binding protein (G protein), alpha inhibiting 2                  |
| capping protein (actin filament), gelsolin-like                                     |
| G protein-coupled receptor 183                                                      |
| CDC42 small effector 2                                                              |
| caspase 7                                                                           |
| neuropilin 1                                                                        |
| integrin alpha 2b                                                                   |

| Synonyms                                                                                    |
|---------------------------------------------------------------------------------------------|
| AA591047 AU042537 EBS1 PCN PLTN Plec1                                                       |
| Cd87 u-PAR uPAR                                                                             |
| 5830411O09Rik 8430421H08Rik 9630005B12Rik AW049894 HHL Hh1 mKIAA0471                        |
| DY6                                                                                         |
| 9430078I07Rik AW049941 AW539721                                                             |
| RAGE                                                                                        |
| E430002D17Rik                                                                               |
| AW122478 Mad Mad1                                                                           |
| AI504491 AW555605 D5Ert444e P2X4                                                            |
| B7 B7-2 B7.2 B70 CLS1 Cd28I2 ETC-1 Ly-58 Ly58 MB7 MB7-2 TS/A-2                              |
| EZF Gklf Zie                                                                                |
| CD120b TNF-R-II TNF-R2 TNF-R75 TNF-alphaR2 TNFBR TNFR80 TNFRII TNFalpha-R2 Tnfr-1 Tnfr2 p75 |
| AI663821 p85                                                                                |
| ABP620 Acf7 AcIp7 MACF R74989 mKIAA0465                                                     |
| AI467586 P2X(7) P2X7R                                                                       |
| ABC-1 Abc1                                                                                  |
| AW553859 CDw210 CDw210a IL-10R1 IL-10RA Il10r mIL-10R                                       |
| -                                                                                           |
| AI448727 BCD1 C86813 CPBP Copeb FM2 FM6 Ierepo1 Ierepo3 R75280 Zf9                          |
| CD227 EMA Muc-1                                                                             |
| LMP                                                                                         |
| 6430573D20Rik C330021E21 RIG-I RLR-1                                                        |
| AA959598 APRO1 Pc3 TIS21                                                                    |
| B-1,4-GalT B-1,4-GalT1 GalT Ggtb Ggtb2 b4Gal-T1 beta-1,4-GalT beta-1,4-GalT1 beta4Gal-T1    |
| Capa-1 Capa1 mu-calpin                                                                      |
| R75581 Ta-Irrp mKIAA0231                                                                    |
| H-4 H4 HNMP-1 MI-35 Ymp                                                                     |
| Birc1e Lgn1 Naip-rs3                                                                        |
| DD7A5-7 EGF-TM7 Emr1 F4/80 Gpf480 Ly71 TM7LN3                                               |
| Bcg Ity Ity1 Lsh Nramp Nramp1 ity                                                           |
| -                                                                                           |
| Flt3lg Ly72L                                                                                |
| C76432 Galphai2 Gia Gnai-2                                                                  |
| gCap39 mbh1                                                                                 |
| Ebi2                                                                                        |
| 2810404F18Rik AA408783 AA536669 SPEC2                                                       |
| AI314680 CMH-1 ICE-IAP3 Mch3 caspase-7 mCASP-7                                              |
| C530029I03 NP-1 NPN-1 Npn1 Nrp                                                              |
| AI172977 CD41 CD41B GpIIb alphaIIb                                                          |

## SUPPLEMENTAL FIGURES

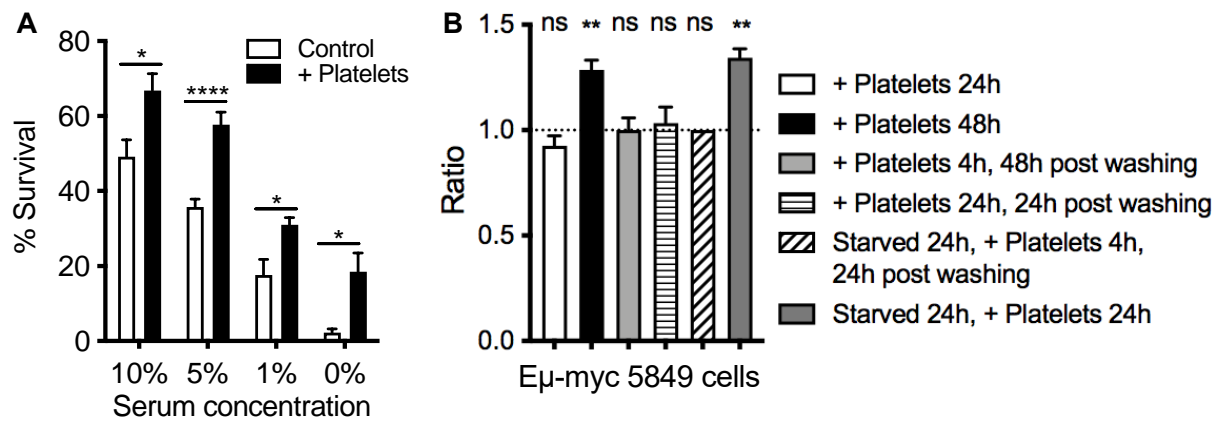**Supplemental Figure 1:****Platelets promote survival of Eμ-myc cell lines.**

**A.** Eμ-myc cell line A118C was co-incubated with murine platelets for 48 h at 37°C and 0-10% serum and % survival was assessed by flow cytometry. n=3-10 per serum concentration.

**B.** Eμ-myc cell line 5849 was co-incubated with murine platelets for indicated times at 37°C and 5% serum and % survival was assessed by flow cytometry. Data is presented as ratio compared to control. It is indicated if serum starvation for 24 h was performed prior platelet incubation. n=3-7 per condition. Results are presented as mean ± SEM. Students unpaired t-test. \* p<0.05; \*\* p<0.005; \*\*\*\*p<0.0001; ns=not significant.

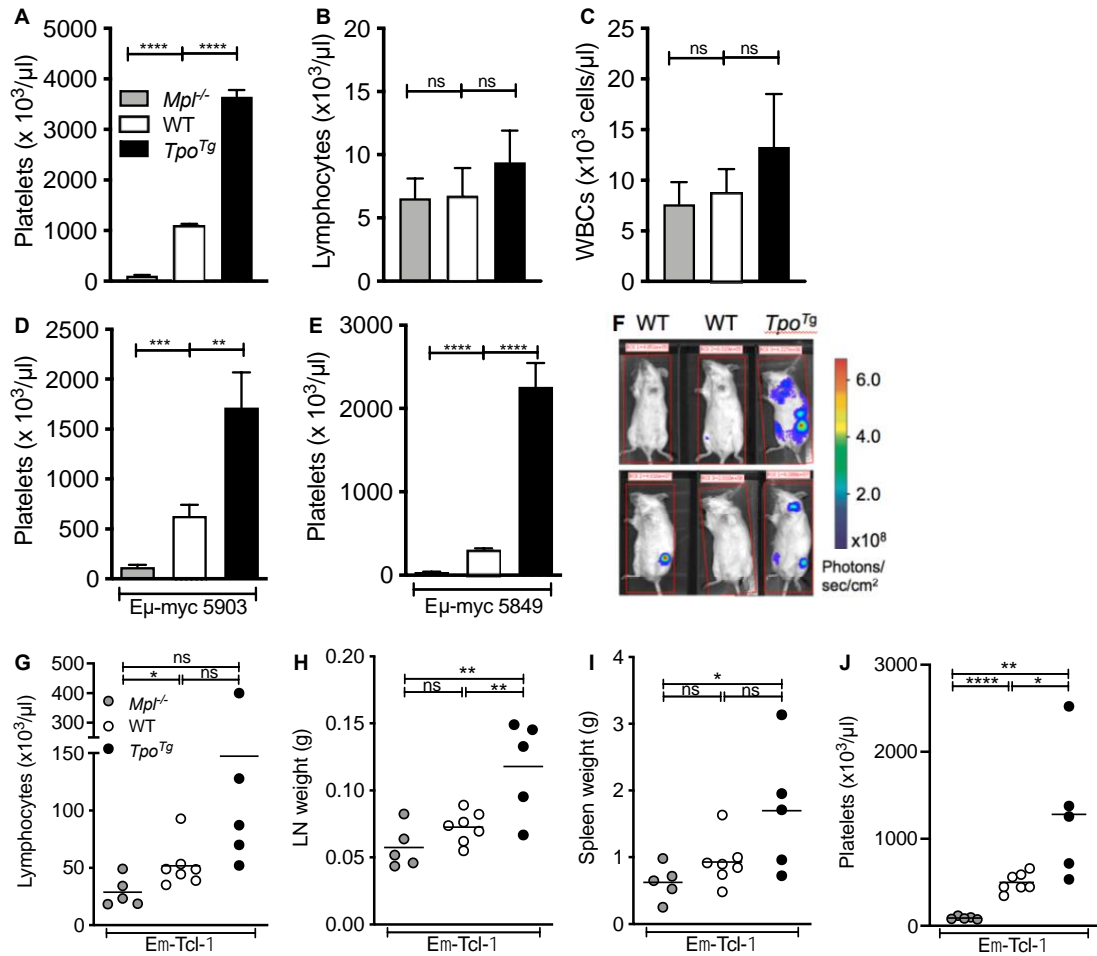

**Supplemental Figure 2:**

**Characterisation of Eμ-myc and Eμ-Tcl-1 transplanted and untransplanted mice**

**A.** Platelet counts in adult wild-type (WT); (n=40), *Mpl<sup>-/-</sup>* (n=14) and *Tpo<sup>Tg</sup>* (n=28) mice. Mean ± SEM. **B-C.** Lymphocyte and WBC counts in adult WT; (n=7), *Mpl<sup>-/-</sup>* (n=19) and *Tpo<sup>Tg</sup>* (n=6) mice. Mean ± SD. Students unpaired t-test. **D.** Platelet counts 23 days post 10,000 Eμ-myc 5903 passage 1 cell *i.v.* transplant into WT, *Mpl<sup>-/-</sup>*, and *Tpo<sup>Tg</sup>* mice. Mean ± SEM. n=9-10 mice per genotype. Students unpaired t-test. **E.** Platelet counts 17 days post 10,000 Eμ-myc 5849 passage 1 cell *i.v.* transplant into WT (n=27), *Mpl<sup>-/-</sup>* (n=18), and *Tpo<sup>Tg</sup>* (n=16) mice. Mean ± SEM. Students unpaired t-test. **F.** Representative image of IVIS imaging (4 WT albino and 2 *Tpo<sup>Tg</sup>* albino mice) 7 days post tumour injection of 10,000 mCherry-luciferase tagged Eμ-myc 5849 tumour cells. **G-J.** Altered Eμ-Tcl-1 leukaemia progression in *Tpo<sup>Tg</sup>* and *Mpl<sup>-/-</sup>* mice. 10,000 Eμ-Tcl-1 passage 1 tumour cells were injected *i.v.* 100 days prior to analysis. **G.** Lymphocyte counts, **H.** Lymph node weight, **I.** Spleen weight and **J.** Platelet count. Each symbol represents an individual mouse. Mean. Students unpaired t-test. \* p<0.05; \*\* p<0.005; \*\*\* p<0.001; \*\*\*\* p<0.0001; ns=not significant.

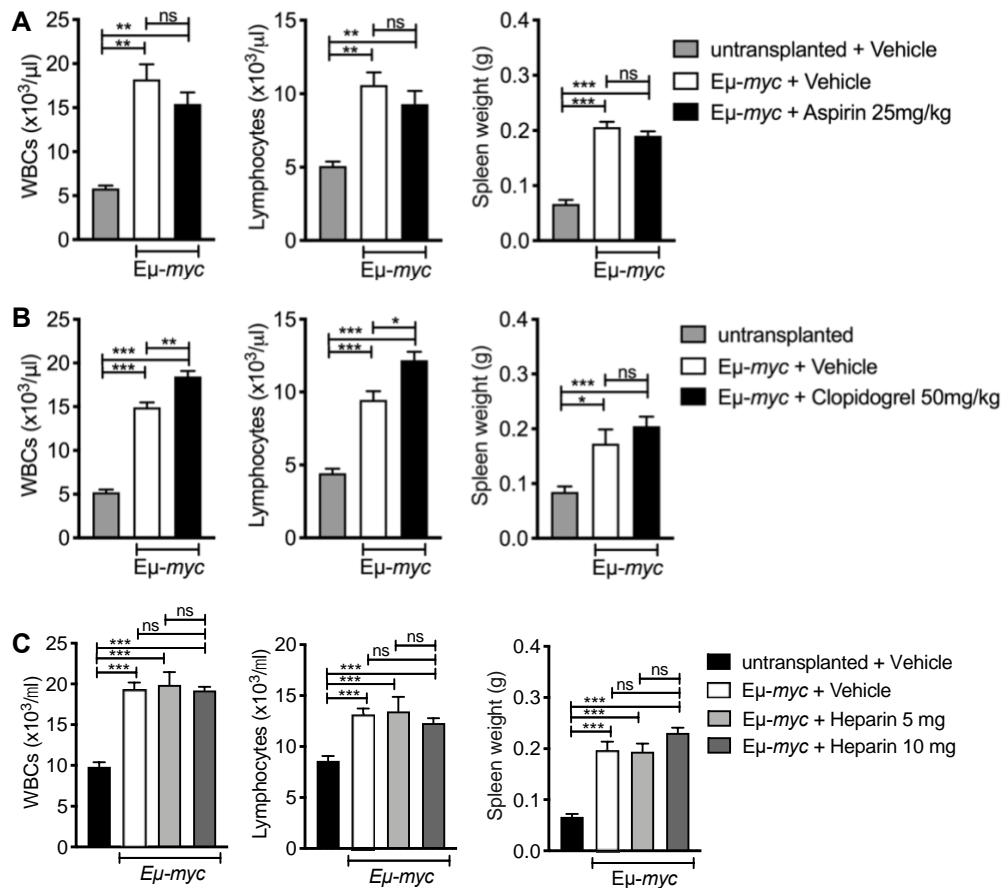

### Suppl. Figure 3: Pharmacological inhibition of platelet function and coagulation.

**A.** WBC and lymphocyte counts and spleen size from male wild-type C57BL/6 mice transplanted *i.v.* with immortalized E $\mu$ -myc 5849 cells ( $2 \times 10^4$ ) and administered aspirin at 25mg/kg orally in drinking water with mice being pre-treated 1 week prior E $\mu$ -myc tumour injection. n=10 aspirin, n=10 vehicle (water) and n=3 untransplanted + vehicle (water) mice. Data is combined from two separate experiments in which mice were analysed 17 and 20 days post tumour transplant. **B.** WBC and lymphocyte counts and spleen size from male mice transplanted *i.v.* with immortalised E $\mu$ -myc 5849 cells ( $2 \times 10^4$ ) and administered clopidogrel by oral gavage daily (50 mg/kg, n=6) or vehicle (0.5% methylcellulose, n=6) starting 1 day prior to tumour transplant. Untransplanted control mice were included (n=4). Mice were analysed 19 days post tumour transplant. **C.** WBC and lymphocyte counts and spleen size from male mice transplanted *i.v.* with immortalised E $\mu$ -myc 5849 cells ( $2 \times 10^4$ ) and administered low molecular weight heparin (LMWH) enoxaparin sodium *s.c.* daily at 5 and 10 mg/kg starting 1 day prior to tumour transplant. n=6 5mg/kg, n=6 10mg/kg, n=12 saline (vehicle), n=4 untransplanted + saline control mice. Data is combined from two separate experiments in which mice were analysed 14 days post tumour transplant Mean  $\pm$  SEM. Students unpaired t-test. \* p<0.05; \*\* p<0.005; \*\*\* p<0.001; \*\*\*\* p<0.0001; ns=not significant.

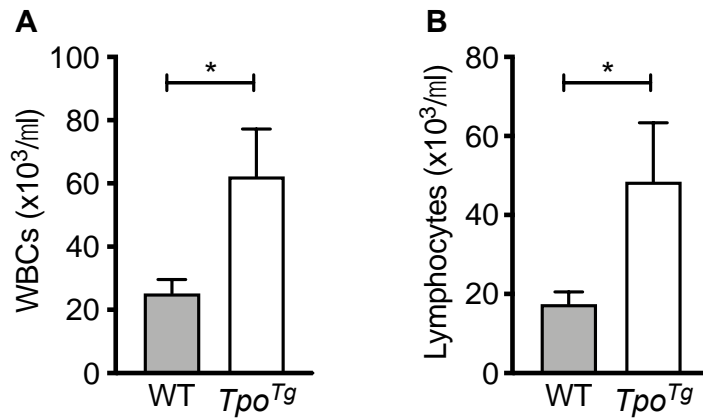**Supplemental Figure 4:****Characterisation of  $E\mu$ -*myc* bearing mice included in RNA sequencing**

$mCherry^+E\mu$ -*myc* 5849 transplanted mice included in RNA sequencing of sorted  $mCherry^+E\mu$ -*myc* cells. **A.** WBC counts and **B.** lymphocyte counts in wild-type (WT) and  $Tpo^{Tg}$  mice post  $mCherry^+E\mu$ -*myc* 5849  $2 \times 10^4$  cell *i.p.* transplant. Cells were collected day 15 (1 WT, 1  $Tpo^{Tg}$ ) and day 19 (3 WT, 2  $Tpo^{Tg}$ ) after transplant. Mean  $\pm$  SEM. Students unpaired t-test. \*  $p < 0.05$ ;
